# Supplementary material for: Identification of a Candidate restorer-of-fertility Gene Rf3 Encoding a Pentatricopeptide Repeat Protein for the Cytoplasmic Male Sterility in Soybean
Source: MDPI journal article supplement (doi:10.3390/ijms23105388), 2022-05-11
Supplement: s1 [file s1]

Table S1 SNPs of *Glyma.09G171200* DNA sequences

| Location    | 69  | 130 | 136 | 185 | 199 | 205 | 221 | 230 | 231  | 249  | 251  | 252  | 258  | 314  | 336  | 366 |
|-------------|-----|-----|-----|-----|-----|-----|-----|-----|------|------|------|------|------|------|------|-----|
| Williams 82 | G   | G   | A   | C   | G   | G   | G   | C   | G    | G    | A    | T    | G    | A    | A    | C   |
| Female      | C   | A   | T   | A   | T   | A   | T   | A   | T    | C    | C    | A    | C    | C    | G    | A   |
| Male        | G   | G   | A   | C   | G   | G   | G   | C   | G    | G    | A    | T    | G    | A    | A    | C   |
| Location    | 381 | 411 | 445 | 447 | 461 | 478 | 529 | 582 | 591  | 629  | 630  | 655  | 671  | 672  | 691  | 766 |
| Williams 82 | A   | T   | G   | T   | A   | A   | G   | T   | T    | A    | A    | A    | A    | T    | T    | A   |
| Female      | G   | G   | A   | C   | G   | C   | A   | C   | C    | T    | G    | G    | C    | C    | G    | T   |
| Male        | A   | T   | G   | T   | A   | A   | G   | T   | T    | A    | A    | A    | A    | T    | T    | A   |
| Location    | 776 | 796 | 908 | 970 | 971 | 974 | 978 | 985 | 1119 | 1334 | 1395 | 1396 | 1407 | 1409 | 1446 |     |
| Williams 82 | G   | T   | A   | G   | G   | T   | G   | A   | T    | T    | A    | T    | A    | C    | T    |     |
| Female      | A   | C   | G   | A   | A   | G   | C   | G   | C    | A    | T    | G    | C    | T    | C    |     |
| Male        | G   | T   | A   | G   | G   | T   | G   | A   | T    | T    | A    | T    | A    | C    | T    |     |
