# Supplementary material for: Identification of a Candidate restorer-of-fertility Gene Rf3 Encoding a Pentatricopeptide Repeat Protein for the Cytoplasmic Male Sterility in Soybean
Source: MDPI journal article supplement (doi:10.3390/ijms23105388), 2022-05-11
Supplement: s1 [file s1]

Table S3 Primers used in this study

| Primer name  | Sequence 5'-3'             | Notes        |
|--------------|----------------------------|--------------|
| SSR_09_1119F | GGCAGGACCAAATTGTGTTT       | Fine mapping |
| SSR_09_1119R | TCAATGTGAATGGATCAGGTT      |              |
| SSR_09_1159F | AAAGAAGACGTGGGCAACAT       |              |
| SSR_09_1159R | ATGCGGAGTGATTGAGAG         |              |
| SSR_09_1161F | TCCCCATTATTTACCATTTTC      |              |
| SSR_09_1161R | TGAACGATTTTACATCCCAAAA     |              |
| InDel09-3F   | TTTGCATGAAACAGTGTTAAGGAG   |              |
| InDel09-3R   | ATTAGGGTGAAAGGCGAGCGAGGG   |              |
| dCAPs09-2F   | TAATCTATTTATTTTTCTCTTCTT   |              |
| dCAPs09-2R   | GTATTTTTTGACTATATTGTCTCGA  |              |
| SSR_09_1170F | CGTCTAAGGTTTTAGTTGGATTCTTT |              |
| SSR_09_1170R | ACGCTCGCATGCATTTACTA       |              |
| SSR_09_1172F | CCTATTTTGGACCAGCCTCA       |              |
| SSR_09_1172R | AGTGCGGTTCCGTATTTGTT       |              |
| SSR_09_1178F | GCTTGAGGTGGCCAAATGTA       |              |
| SSR_09_1178R | GGATTGGTGACCATATTCATTG     |              |
| SSR_09_1184F | ACCTGCAGTCCTGCACATT        |              |
| SSR_09_1184R | TGTCTGAGTCTATCCGCATT       |              |
| SSR_09_1200F | ATCCACCCACAGTTACCCAA       |              |
| SSR_09_1200R | ATGGGGTGGAACATTTGAA        |              |
| 11F5-1       | GTAACATAAAATGCCCCAGA       | Gene cloning |
| 11R5-1       | TTAACCCATAGATTGCTTGA       |              |
| 11F5-2       | CGCTAGAGGAGCACGGATAC       |              |
| 11R5-2       | TTAGGCATGTTCACTGTTGT       |              |
| 1712F2       | CGAGTCAGTAGAGGGATA         |              |
| 1712R2       | GACAGTAATCATTGCTAT         |              |
| 1713F3       | GGAGATAGGAGACAAAATTTAC     |              |
| 1713R3       | CTCAATTTTGAGTATCCCTA       |              |
| 1714F3       | GTTGAATTAAGTATCGATGAA      |              |
| 1714R3       | AATTAAGTCAGATTTCAGTG       |              |
| 1715F3       | ATGGTAACCATTCGTGCAGGTGAAA  |              |
| 1715R3       | TCAACCATCAATTGGTTTAGCCAGG  |              |
| 1716F3       | GGTGGACCAAGAAAGACTTAGT     |              |
| 1716R3       | AATCTTCATCTGTGCTATAGGC     |              |
| 1717F3       | ATGGCTTATGATATGTCCATAAGC   |              |
| 1717R3       | CTAACCATTTTGCATTTTCTTC     |              |
| 1718F12      | CAGAATAGCCCTGGTTACAG       |              |
| 1718R12      | AAAAGAAGGCAGGTACCAAT       |              |
| 19F5-1       | TAGCTGCCAATGGAAGCGGC       |              |
| 19R5-1       | AATGGTACCTTGAGTCGACG       |              |
| 20F6-1       | ATGGCGTCGGAATCCACCGGAGACG  |              |
| 20R6-1       | GATTACCTTTAACATTCTAAGCTC   |              |

|         |                                 |                             |
|---------|---------------------------------|-----------------------------|
| 20F4-2  | AAGGACCTTTAAGTAGACAG            |                             |
| 20R4-2  | AATTAAGATGGAAGCCAC              |                             |
| 20F4-3  | TCGCAATCTTATGTTGTATAACTCC       |                             |
| 20R4-3  | AGGGCTATCCAAGGTTGGGAAT          |                             |
| Cons4-F | GATCAGCAATTATGCACAACG           | qRT-PCR                     |
| Cons4-R | CCGCCACCATTTCAGATTATGT          |                             |
| Q11F1   | TAATAATGGTGTGTTGGGGGT           |                             |
| Q11R1   | ATTTGAAGAAAAATCAGAAGCT          |                             |
| Q12F1   | GCATTATGTAAAGAAGGAAAGG          |                             |
| Q12R1   | GTAAGTGTGAACGTCAGGAGTC          |                             |
| Q13F1   | GGATATAATAAGTCTTGCTTGG          |                             |
| Q13R1   | CTATAGTCCACTTCTTCCCCAT          |                             |
| Q14F1   | ATTATGCTATTGCACTGTTT            |                             |
| Q14R1   | AGTCACTTTGACTTACCGTTTT          |                             |
| Q15F1   | ATTGCTCGTATTTATGGTCTTG          |                             |
| Q15R1   | CTTTTACTGAACTTCCCTCTTG          |                             |
| Q16F1   | GATCTATCATTCTATGTTTGGT          |                             |
| Q16R1   | ATGTTTCATTCTTTACTGCCTT          |                             |
| Q17F1   | TCTAGTGGATGTAGTGGAAAAC          |                             |
| Q17R1   | TGCTGAGGATAGTGGGAATGTG          |                             |
| Q18F3   | GCGCCTATAGTTTCATTTTTGC          |                             |
| Q18R3   | GCAATTAGAGCGTCTGGATCTC          |                             |
| Q19F1   | TTCTCTGATACCCCTCCTTAAC          |                             |
| Q19R1   | CTGCATAGACCTGTCCTACTCT          |                             |
| Q20F1   | GATCTTTTTGAGAGTCTGGTGA          |                             |
| Q20R1   | ACATAGTAATATGCTTGGTGCG          |                             |
| ZF12    | ACGCGTCGACATGCTGTGTATGCGTCATA   | Subcellular<br>localization |
| ZR12    | AAAACCTGCAGCAACAAGCCTCTAGCAATCA |                             |
