# Supplementary material for: Identification of a Candidate restorer-of-fertility Gene Rf3 Encoding a Pentatricopeptide Repeat Protein for the Cytoplasmic Male Sterility in Soybean
Source: MDPI journal article supplement (doi:10.3390/ijms23105388), 2022-05-11
Supplement: s1 [file s1]

Table S2 SNPs of Glyma.09G171200 protein sequences

| Location    | 23  | 44  | 46  | 62  | 67  | 69  | 74  | 77  | 83  | 84  | 105 | 137 | 149 | 154 | 160 | 176 |
|-------------|-----|-----|-----|-----|-----|-----|-----|-----|-----|-----|-----|-----|-----|-----|-----|-----|
| Williams 82 | M   | D   | I   | T   | V   | A   | R   | P   | L   | N   | K   | F   | D   | N   | M   | A   |
| Female      | I   | N   | F   | N   | L   | T   | M   | H   | F   | T   | T   | L   | N   | S   | L   | T   |
| Male        | M   | D   | I   | T   | V   | A   | R   | P   | L   | N   | K   | F   | D   | N   | M   | A   |
| Location    | 210 | 219 | 224 | 231 | 256 | 259 | 266 | 303 | 324 | 325 | 329 | 445 | 466 | 469 | 470 |     |
| Williams 82 | E   | N   | N   | C   | I   | S   | F   | N   | G   | I   | S   | L   | F   | E   | T   |     |
| Female      | V   | D   | T   | G   | F   | N   | L   | S   | N   | R   | G   | Q   | V   | D   | I   |     |
| Male        | E   | N   | N   | C   | I   | S   | F   | N   | G   | I   | S   | L   | F   | E   | T   |     |
